# Supplementary material for: Early stopping in clinical PET studies: how to reduce expense and exposure
Source: bioRxiv or medRxiv preprint supplement (doi:10.1101/2020.09.13.20192856), 2021-06-03
Supplement: Supplementary file [file media-1.pdf]

## Supplementary information - Early stopping in clinical PET studies: how to reduce expense and exposure

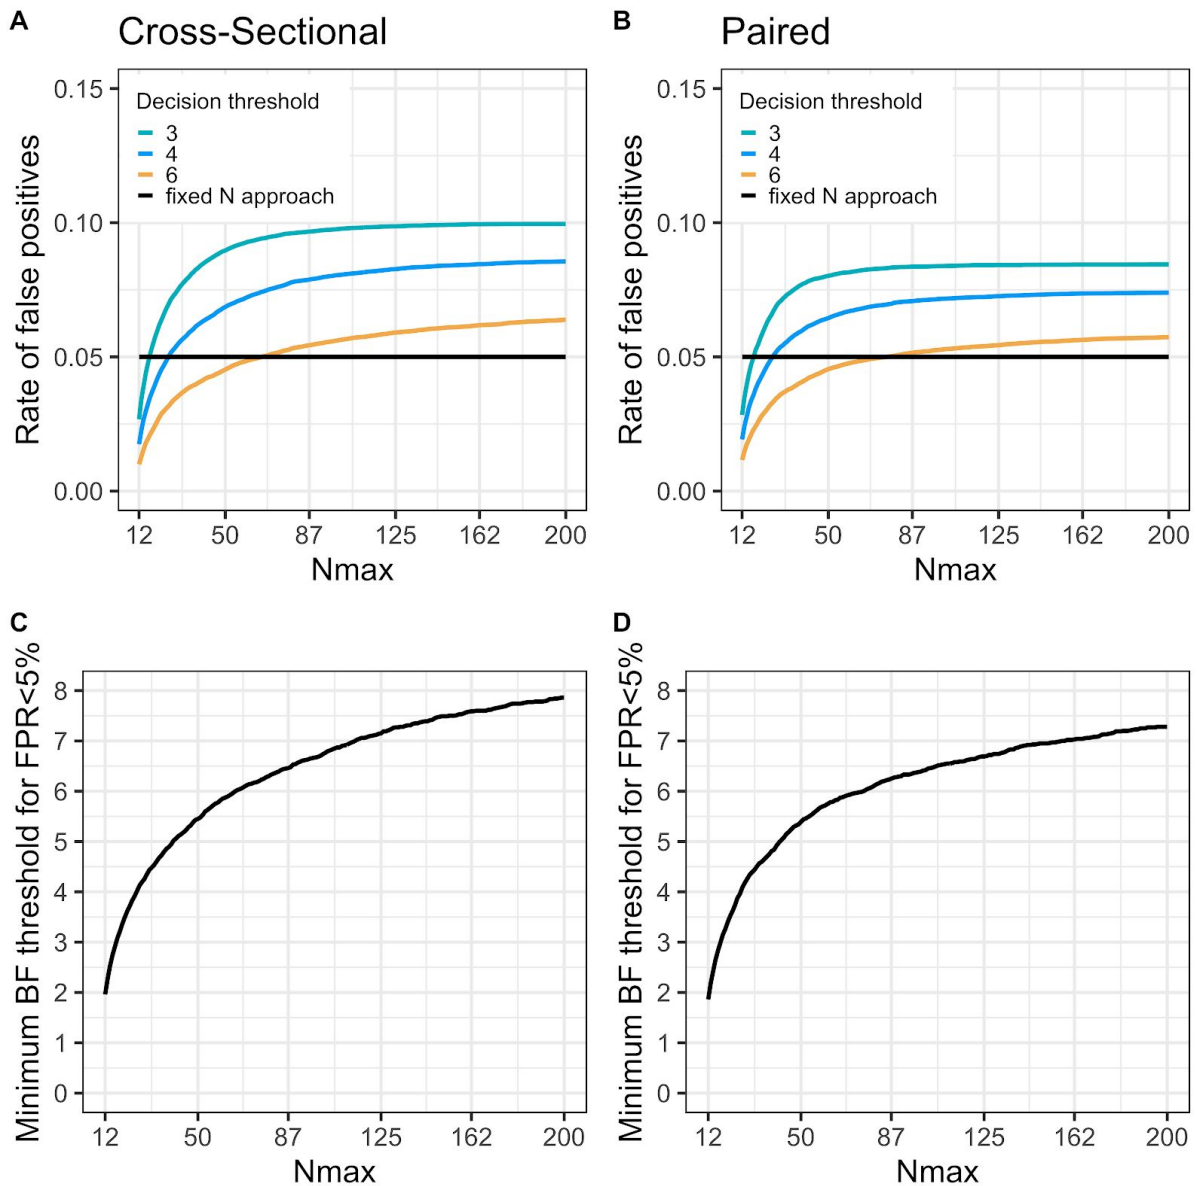

Figure S1. A and B) The rate of false positive stopping decisions increases but reaches an asymptote as the maximal number of subjects ( $N_{max}$ ) becomes higher. Three different BF decision thresholds are shown. C and D) The BF decision threshold can be adjusted to achieve a desired rate of false positives (here 5%) for different  $N_{max}$ . For all figures: samples are drawn from two populations with the same mean value; testing starts at  $N=12$ /group; and BF is checked after every additional comparison pair (1 set of patient-control scans or pre-post scans). Here stop decisions for  $H_0$  are allowed and the tests are one-sided.

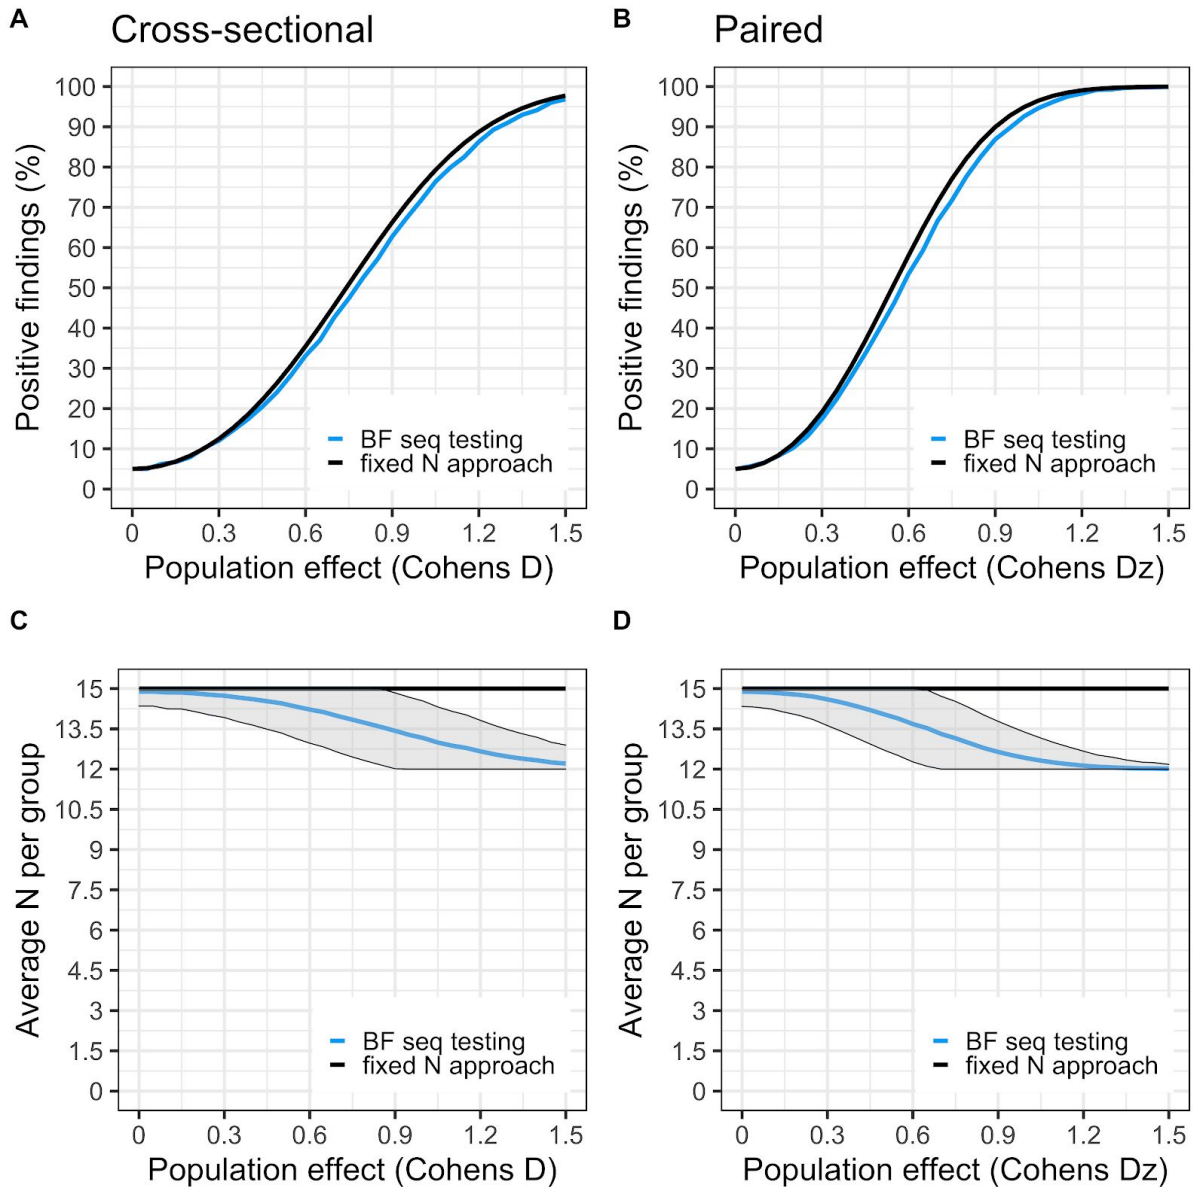

Figure S2. Settings for the simulation:  $H1$  is a two-sided cauchy(0,0.707), ( $N_{start} = 12$ ,  $N_{max} = 15$ , BF threshold = 2.4 and 2.5 for cross-sectional and paired respectively). Panel A and B shows true positive (or “power”) curves for BF sequential testing (blue) and a fixed N approach (black). The curves denote the rate of true positive findings at different population effects. For the fixed N approach, only one test is performed at  $N=15$  per group. For the sequential testing, 8 subjects/group are first collected, then BF is checked after each added comparison pair until 15 subjects/group is reached, using a stopping threshold of 4. Panel C and D shows the average number of subjects needed to reach a stopping decision at different population effects. Fixed N is the black line (fixed at  $N = 15$ /group); BF sequential testing is the blue line with shaded area denoting  $\pm 1$  SD.

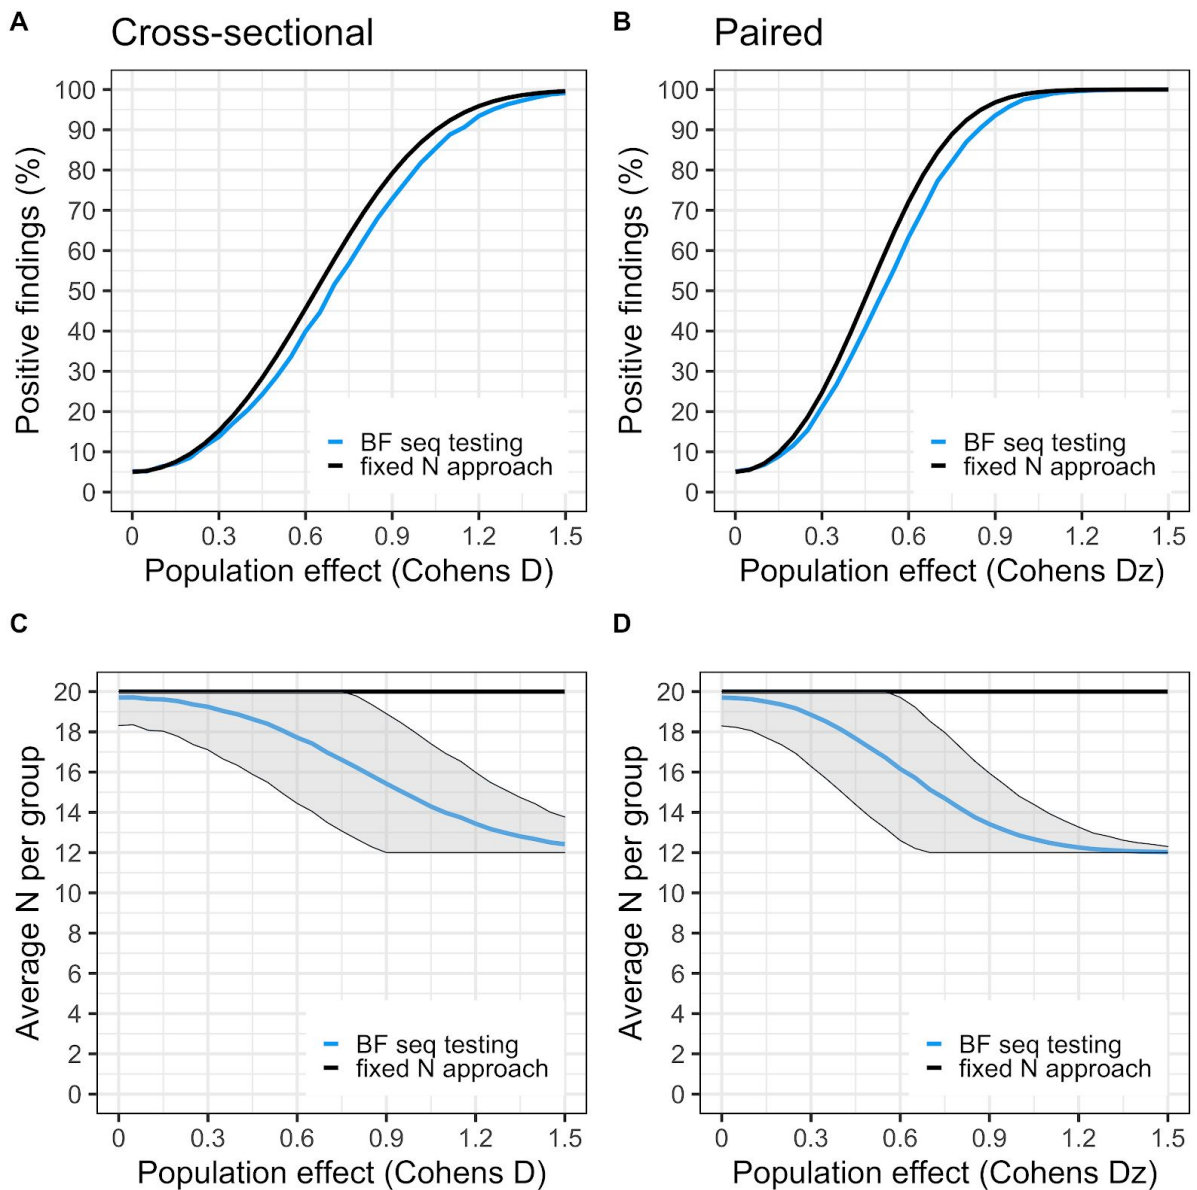

Figure S3. Settings for the simulation:  $H1$  is a two-sided cauchy(0,0.707), ( $N_{start} = 12$ ,  $N_{max} = 20$ , BF threshold = 3.1 and 3.3 for cross-sectional and paired respectively). Panel A and B shows true positive (or “power”) curves for BF sequential testing (blue) and a fixed N approach (black). The curves denote the rate of true positive findings at different population effects. For the fixed N approach, only one test is performed at  $N=20$  per group. For the sequential testing, 12 subjects/group are first collected, then BF is checked after each added comparison pair until 20 subjects/group is reached, using a stopping threshold of 4. Panel C and D shows the average number of subjects needed to reach a stopping decision at different population effects. Fixed N is the black line (fixed at  $N = 20$ /group); BF sequential testing is the blue line with shaded area denoting  $\pm 1$  SD.

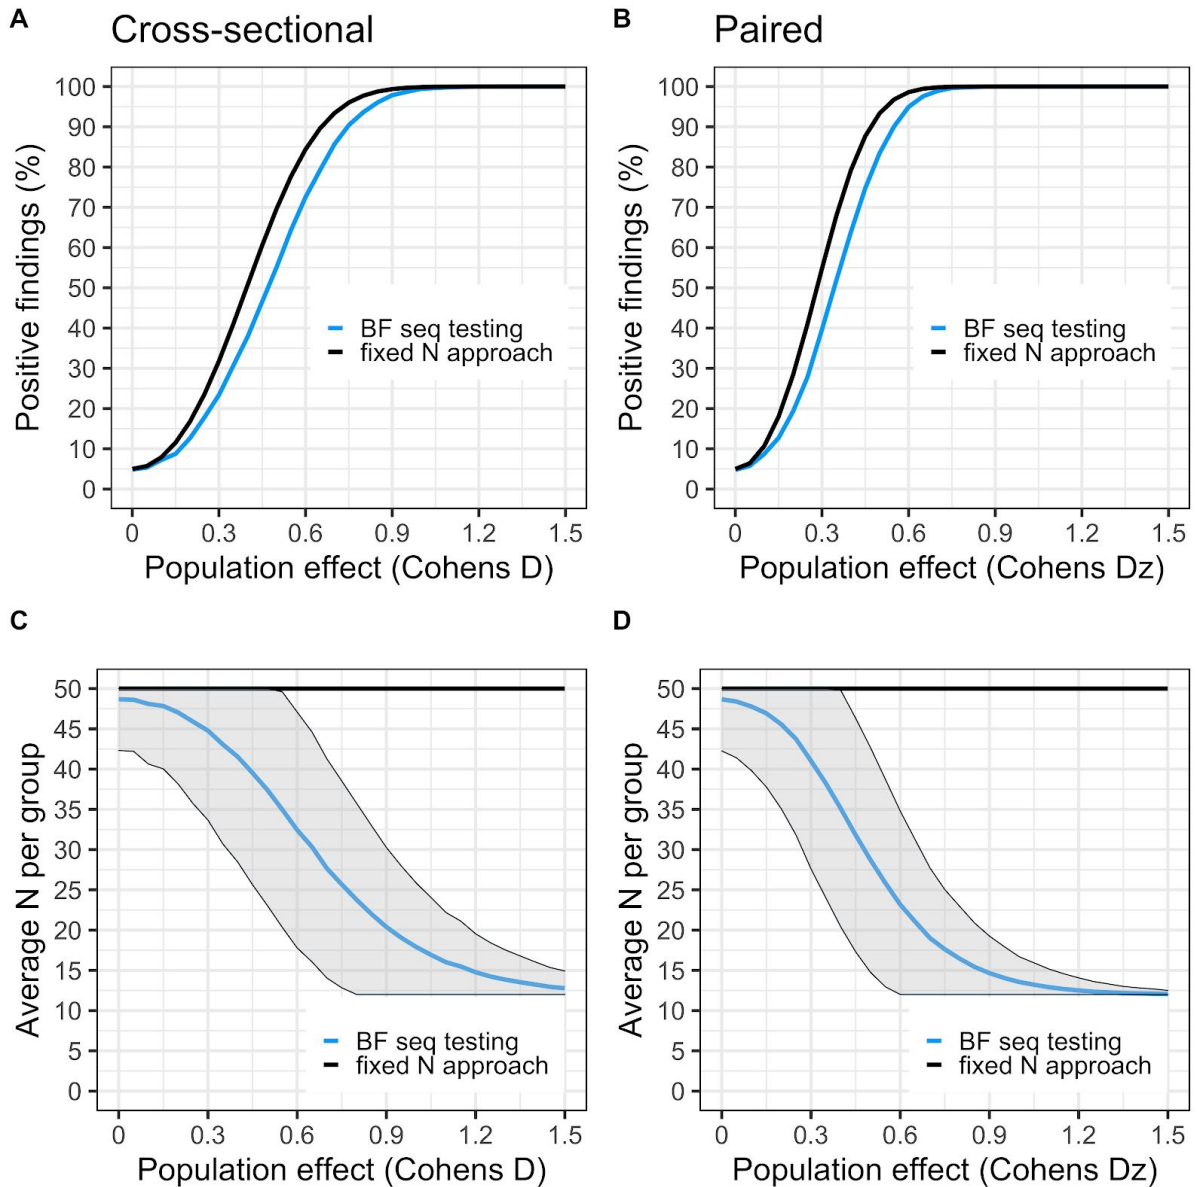

Figure S4. Settings for the simulation:  $H1$  is a two-sided cauchy(0,0.707), ( $N_{start} = 12$ ,  $N_{max} = 50$ , BF threshold = 5.2 and 5.4 for cross-sectional and paired respectively). Panel A and B shows true positive (or “power”) curves for BF sequential testing (blue) and a fixed N approach (black). The curves denote the rate of true positive findings at different population effects. For the fixed N approach, only one test is performed at  $N=50$  per group. For the sequential testing, 12 subjects/group are first collected, then BF is checked after each added comparison pair until 50 subjects/group is reached, using a stopping threshold of 4. Panel C and D shows the average number of subjects needed to reach a stopping decision at different population effects. Fixed N is the black line (fixed at  $N = 50$ /group); BF sequential testing is the blue line with shaded area denoting  $\pm 1$  SD.

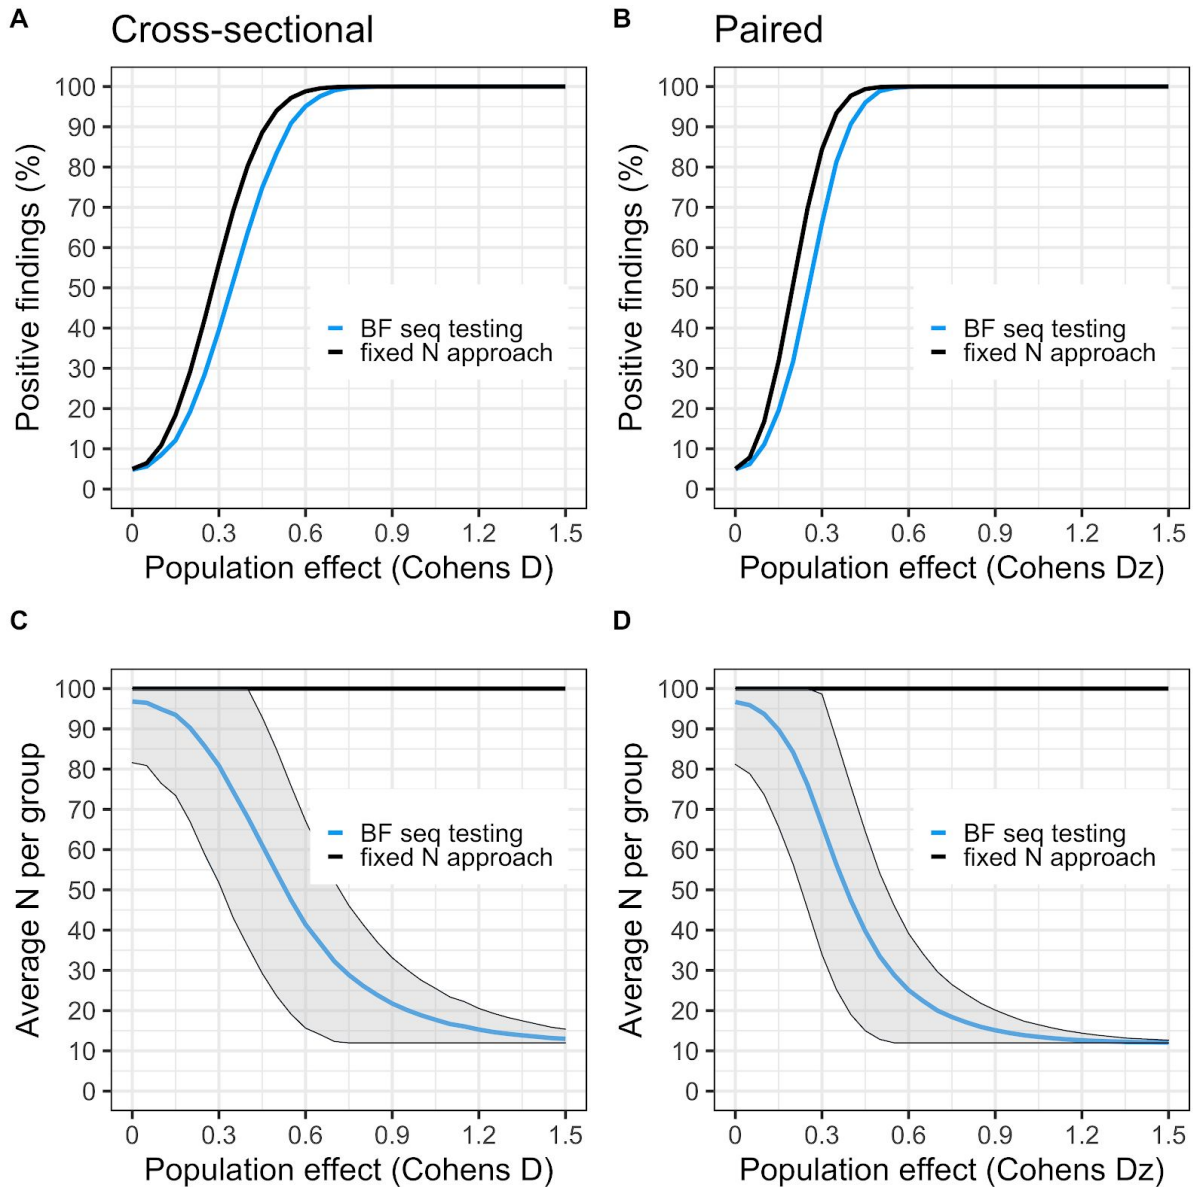

Figure S5. Settings for the simulation:  $H1$  is a two-sided cauchy(0,0.707), ( $N_{start} = 12$ ,  $N_{max} = 100$ , BF threshold = 6.6 and 6.7 for cross-sectional and paired respectively). Panel A and B shows true positive (or “power”) curves for BF sequential testing (blue) and fixed N approach (black). The curves denote the rate of true positive findings at different population effects. For the fixed N approach, only one test is performed at  $N=100$  per group. For the sequential testing, 12 subjects/group are first collected, then BF is checked after each added comparison pair until 100 subjects/group is reached, using a stopping threshold of 4. Panel C and D shows the average number of subjects needed to reach a stopping decision at different population effects. Fixed N is the black line (fixed at  $N = 100$ /group); BF sequential testing is the blue line with shaded area denoting  $\pm 1$  SD.

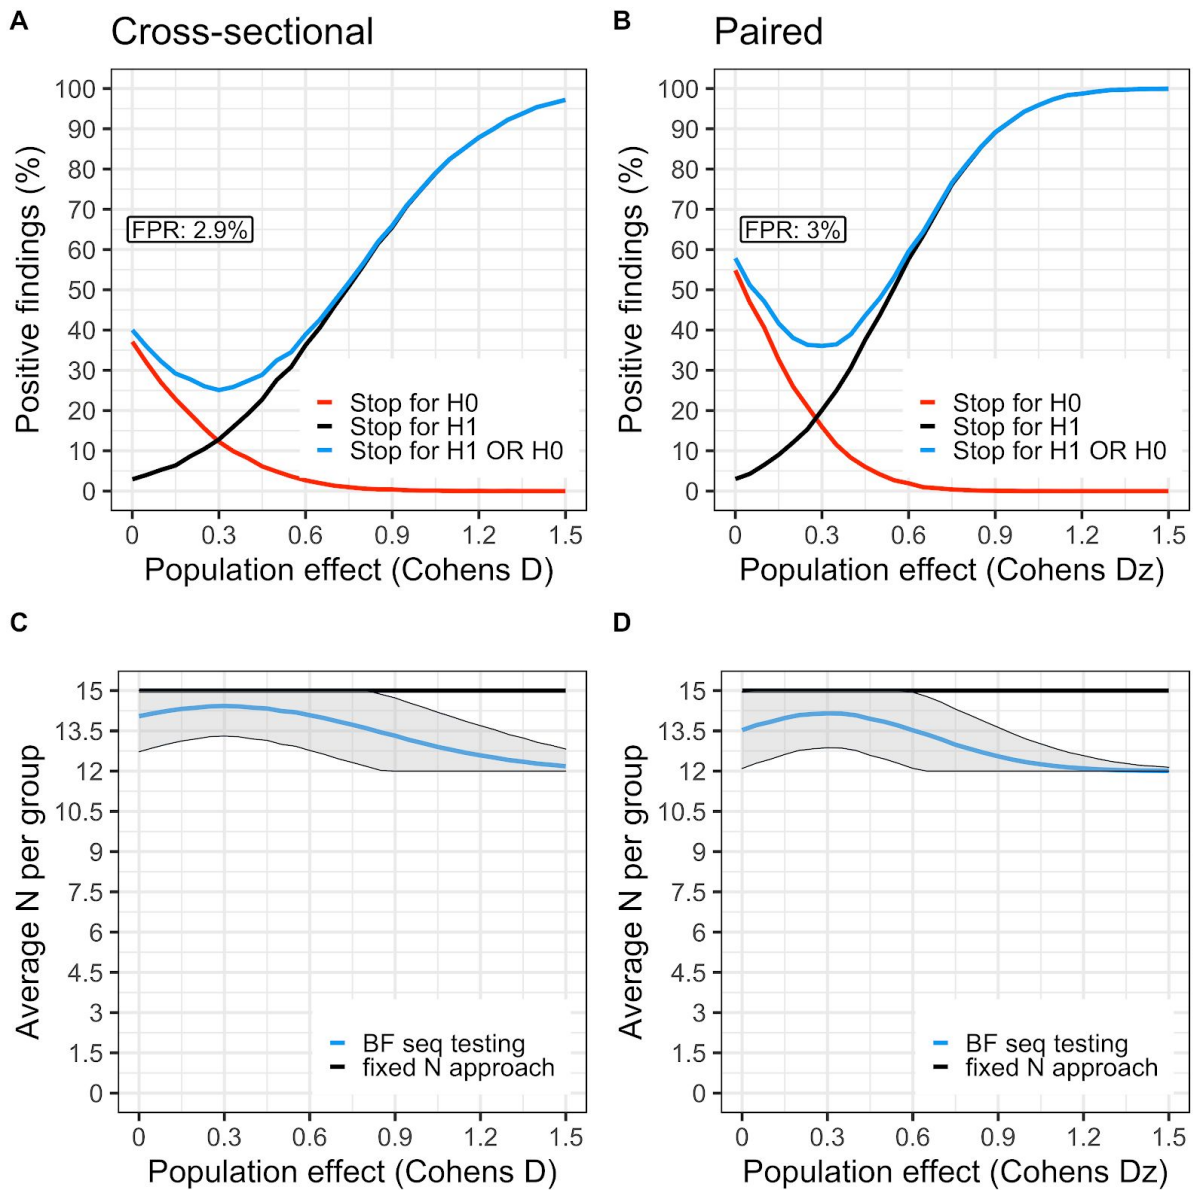

Figure S6. Settings for the simulation:  $H1$  is a one sided cauchy(0,0.707), ( $N_{start} = 12$ ,  $N_{max} = 15$ ,  $BF$  threshold = 4). A and B) The black curve shows the proportion of studies that showed support for  $H1$  ( $BF > 4$ ) during data collection, at a range of population effects (starting at no effect,  $D = 0$ ). The red curve is the proportion of studies showing support for  $H0$  ( $BF < 1/4$ ). The blue curve is the sum of the red and black curves. C and D) shows the average number of subjects needed to reach a stopping decision at different population effects. The flat black line represents  $N_{max}$  (15 subjects/group).  $BF$  sequential testing is the blue line with shaded area denoting  $\pm 1$  SD.



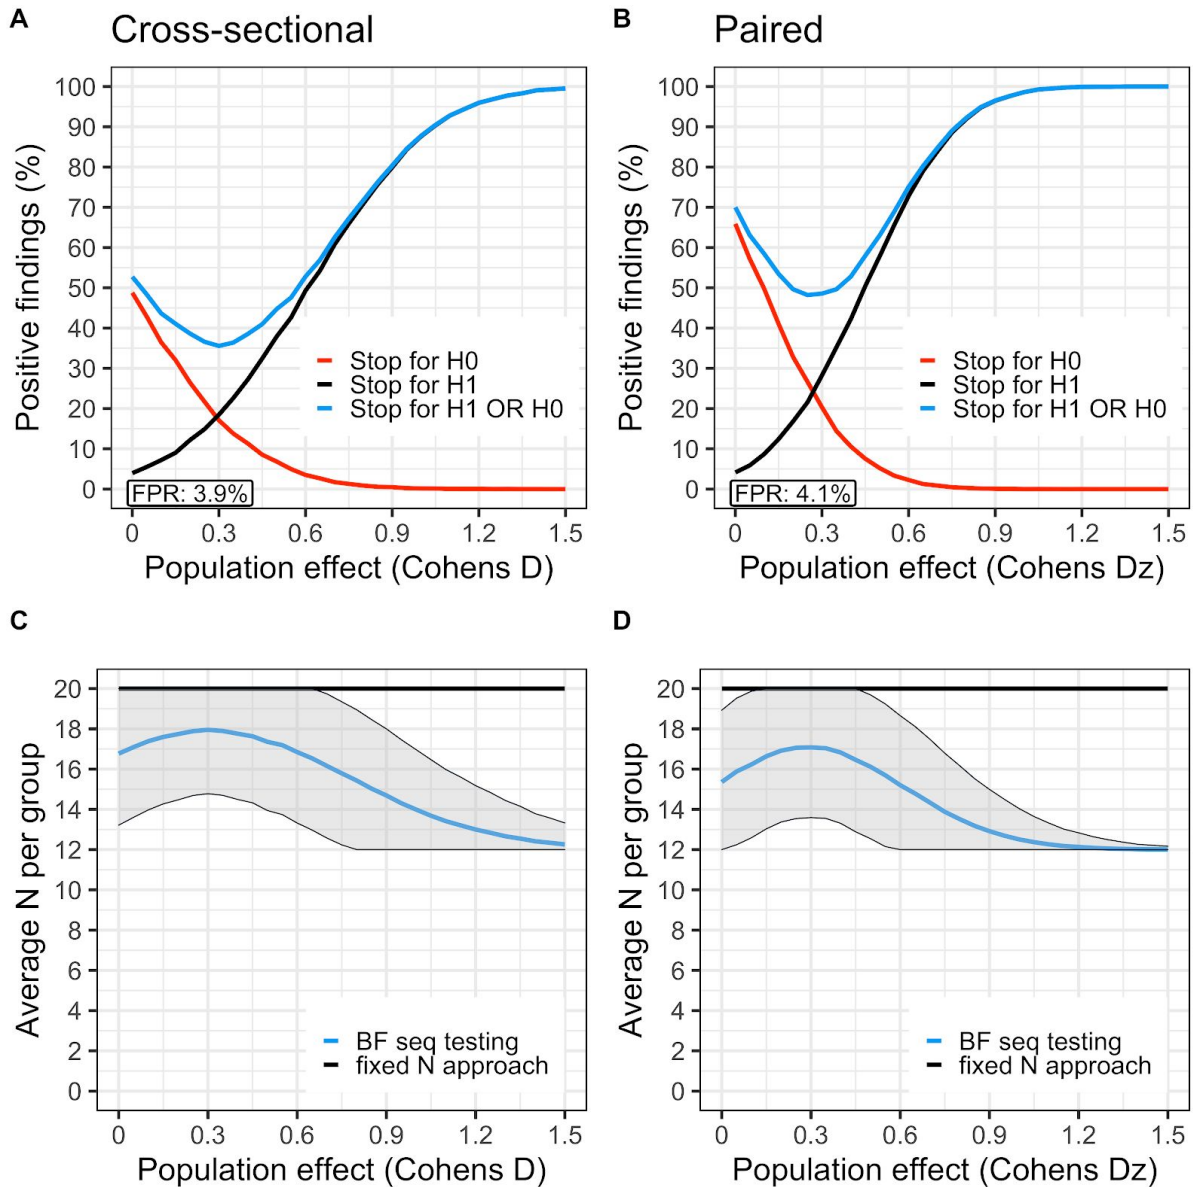

Figure S7. Settings for the simulation:  $H1$  is a one sided cauchy(0,0.707), ( $N_{start} = 12$ ,  $N_{max} = 20$ ,  $BF$  threshold = 4). A and B) The black curve shows the proportion of studies that showed support for  $H1$  ( $BF > 4$ ) during data collection, at a range of population effects (starting at no effect,  $D = 0$ ). The red curve is the proportion of studies showing support for  $H0$  ( $BF < 1/4$ ). The blue curve is the sum of the red and black curves. C and D) shows the average number of subjects needed to reach a stopping decision at different population effects. The flat black line represents  $N_{max}$  (20 subjects/group).  $BF$  sequential testing is the blue line with shaded area denoting  $\pm 1$  SD.

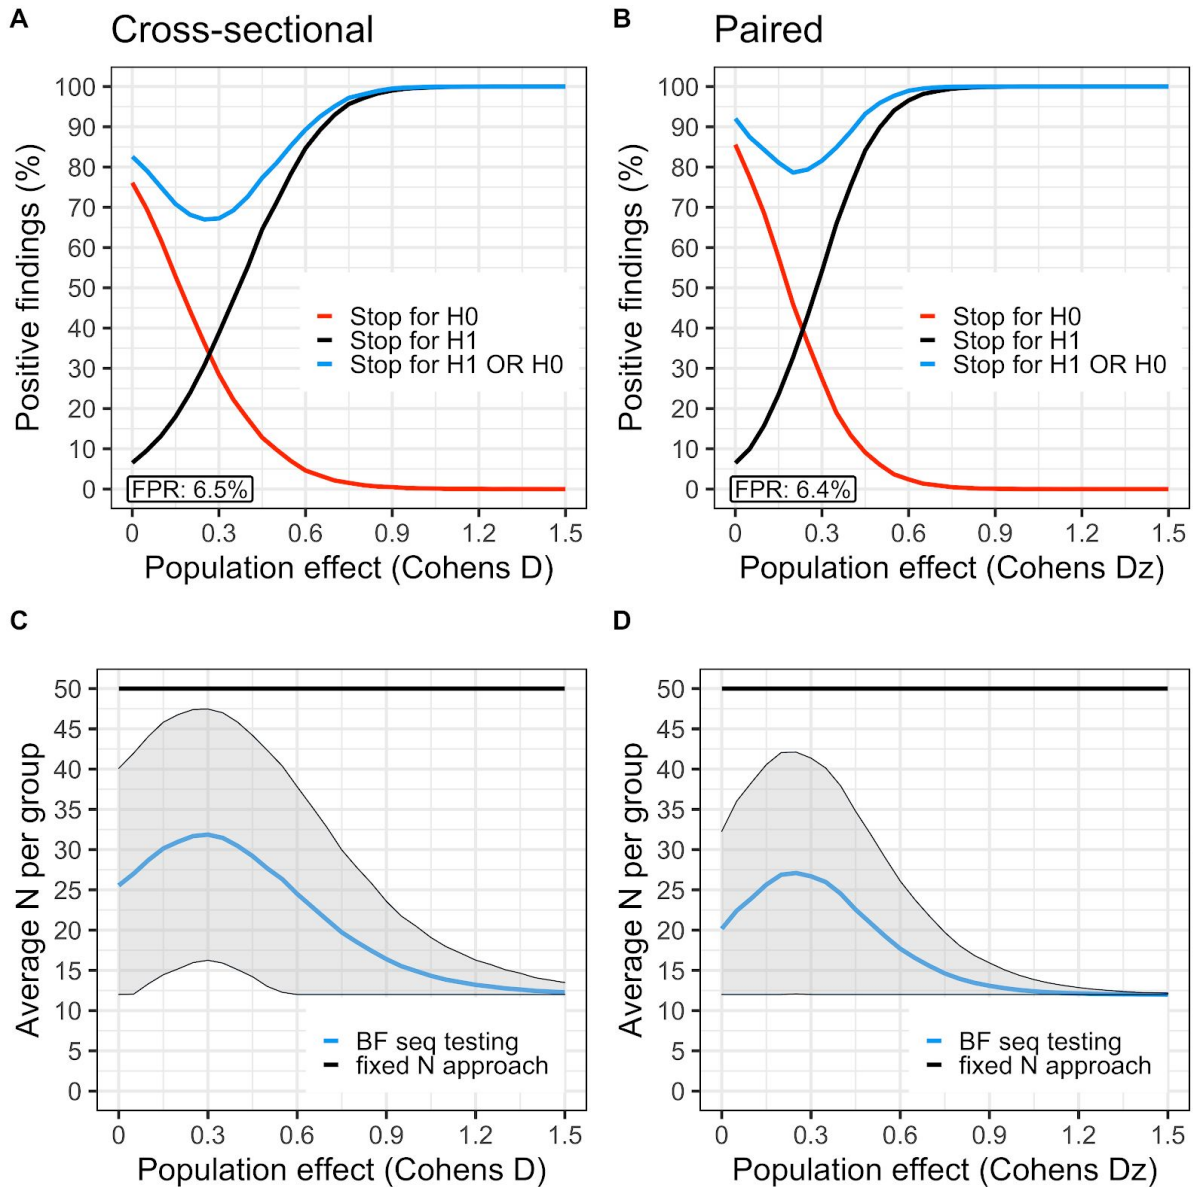

Figure S8. Settings for the simulation:  $H1$  is a one sided cauchy(0,0.707), ( $N_{start} = 12$ ,  $N_{max} = 50$ ,  $BF$  threshold = 4). A and B) The black curve shows the proportion of studies that showed support for  $H1$  ( $BF > 4$ ) during data collection, at a range of population effects (starting at no effect,  $D = 0$ ). The red curve is the proportion of studies showing support for  $H0$  ( $BF < 1/4$ ). The blue curve is the sum of the red and black curves. C and D) shows the average number of subjects needed to reach a stopping decision at different population effects. The flat black line represents  $N_{max}$  (50 subjects/group).  $BF$  sequential testing is the blue line with shaded area denoting  $\pm 1$  SD.



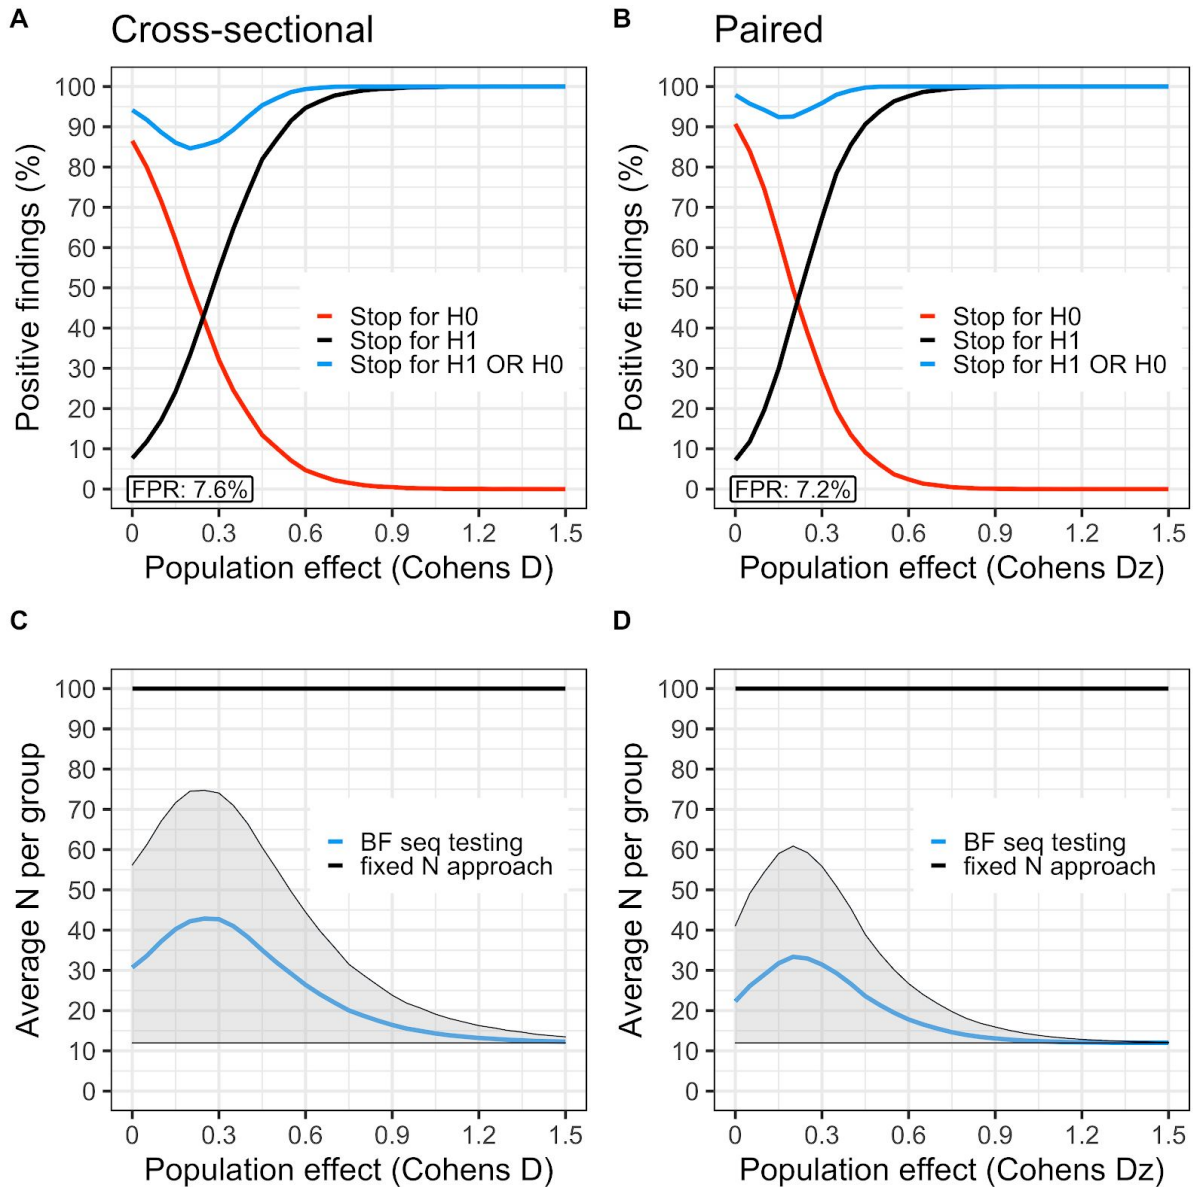

Figure S9. Settings for the simulation:  $H1$  is a one sided cauchy(0,0.707), ( $N_{start} = 12$ ,  $N_{max} = 100$ ,  $BF$  threshold = 4). A and B) The black curve shows the proportion of studies that showed support for  $H1$  ( $BF > 4$ ) during data collection, at a range of population effects (starting at no effect,  $D = 0$ ). The red curve is the proportion of studies showing support for  $H0$  ( $BF < 1/4$ ). The blue curve is the sum of the red and black curves. C and D) shows the average number of subjects needed to reach a stopping decision at different population effects. The flat black line represents  $N_{max}$  (100 subjects/group).  $BF$  sequential testing is the blue line with shaded area denoting  $\pm 1$  SD.

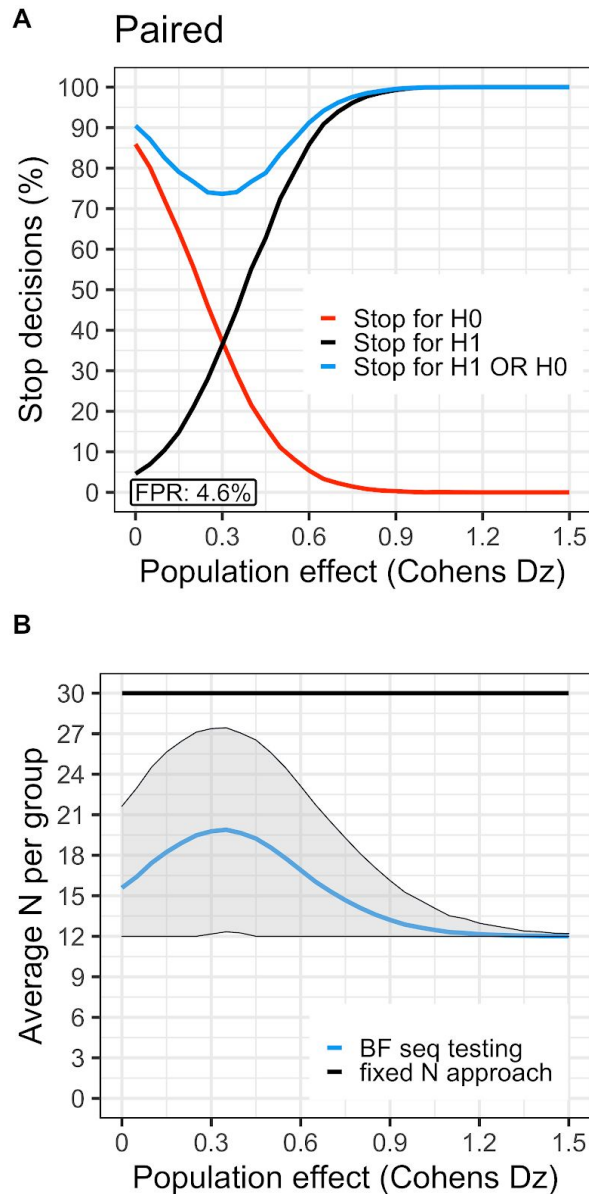

Figure S10. Settings for the simulation:  $H1$  is a one sided cauchy(0,1), ( $N_{start} = 8$ ,  $N_{max} = 30$ ,  $BF$  threshold = 4). A) The black curve shows the proportion of studies that showed support for  $H1$  ( $BF > 4$ ) during data collection, at a range of population effects (starting at no effect,  $D = 0$ ). The red curve is the proportion of studies showing support for  $H0$  ( $BF < 1/4$ ). The blue curve is the sum of the red and black curves. B) shows the average number of subjects needed to reach a stopping decision at different population effects. The flat black line represents  $N_{max}$  (30 subjects/group).  $BF$  sequential testing is the blue line with shaded area denoting  $\pm 1$  SD. The fact that a lower average sample size trades off against a higher risk of false negatives can be seen by comparing this figure to panel B and D in Figure 5 from the main text which have the same settings except for: 1)  $H1 : \delta \sim \text{Cauchy}(0, 0.707)$  instead of  $H1 : \delta \sim \text{Cauchy}(0, 1)$  and 2) testing starts at 12 subjects.

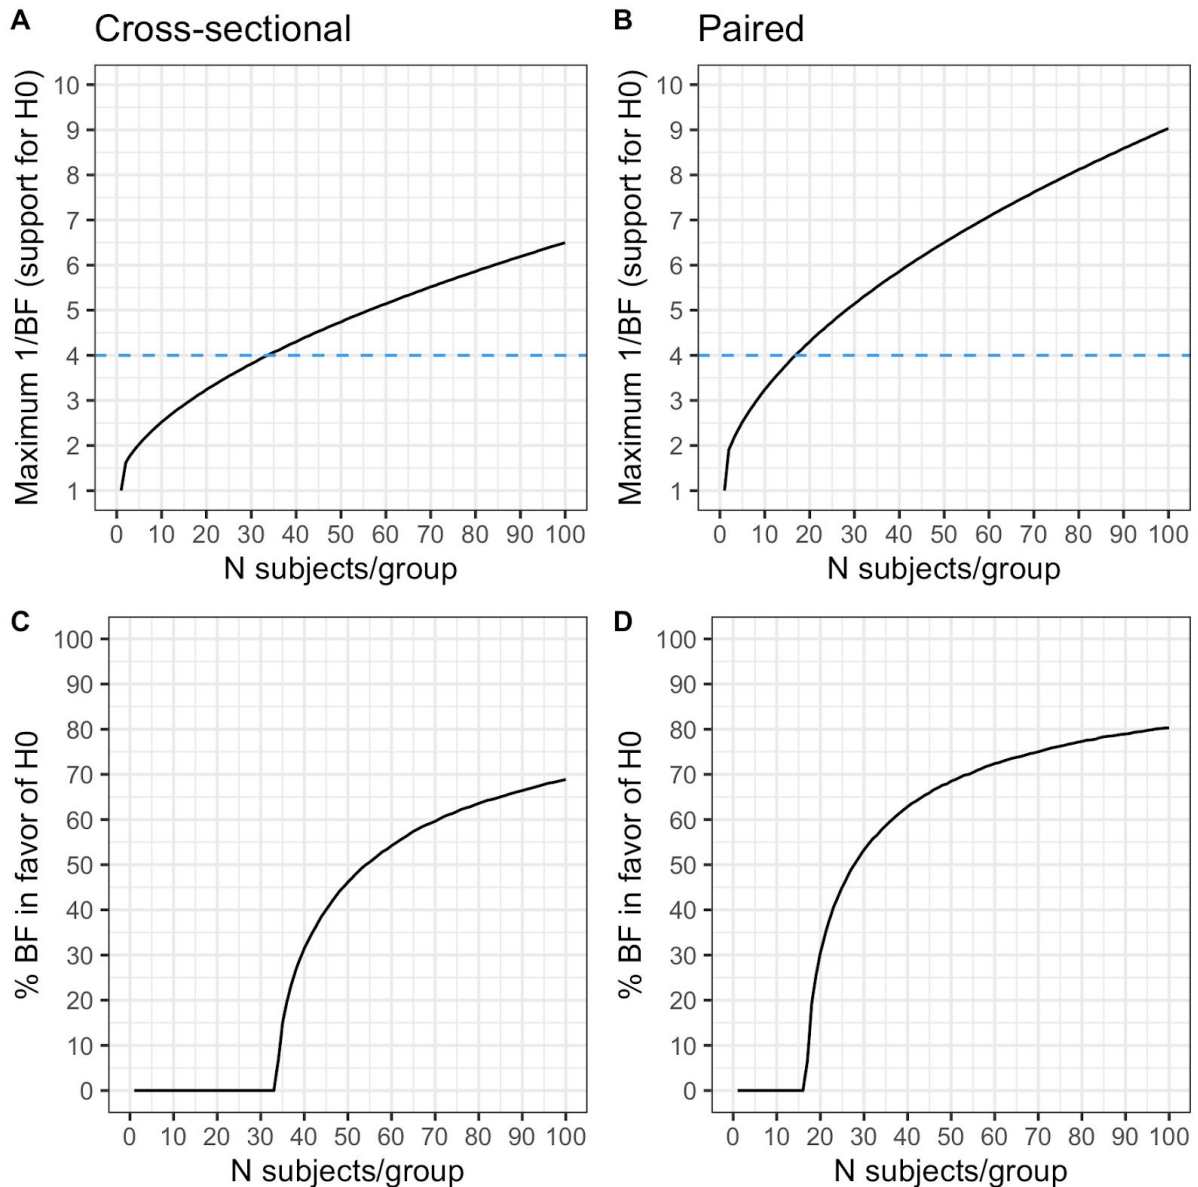

Figure S11. Maximum possible support ( $1/BF$ ) in favor of  $H_0$  compared to  $H_1$  when using a two-tailed BF t-test. A-D) When using the settings described in the main article ( $H_1$  is specified as a  $Cauchy(0,0.707)$ ,  $N_{start} = 12$ , threshold = 4) but a two-tailed test instead of a one-tailed test, it is not possible to obtain evidence in favor of  $H_0$  at smaller  $N$ . E.g., in a cross-sectional design, at least 34 subjects/group are needed before the BF can reach a threshold of  $1/4$ . C-D) Percentage of BF showing support ( $1/BF > 4$ ) for  $H_0$  at different  $N$ . E.g., at 50 subjects/group, only 45% of BF will show support in favor of  $H_0$ , when  $H_0$  is true. Hence, in order to stop for  $H_0$  when using commonly seen sample sizes in PET studies, we recommend to use a one-tailed BF t-test instead. This means that the researchers must make a prediction of the direction of the effect before initiating the study.

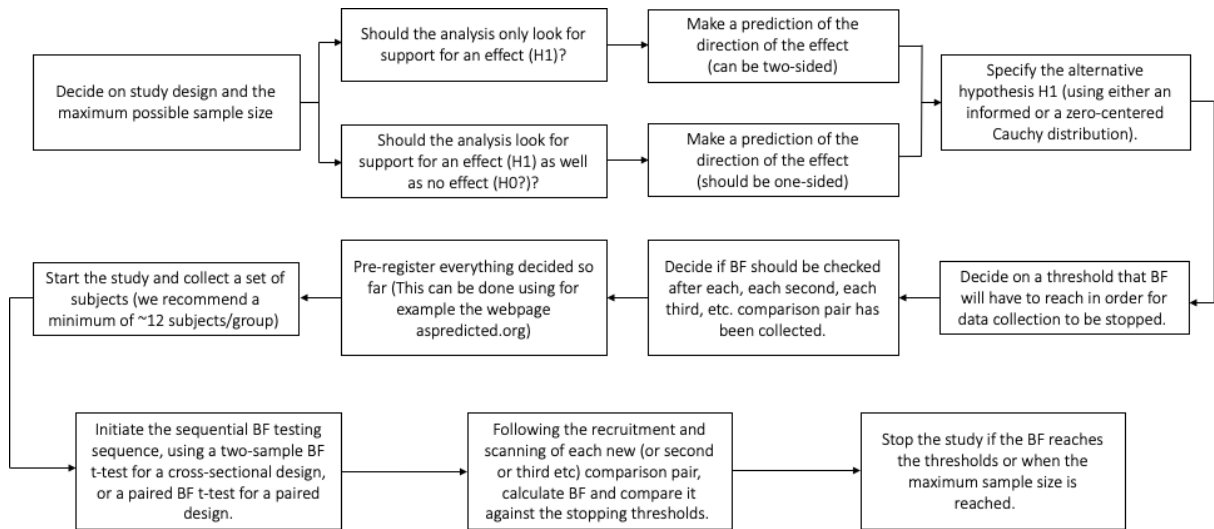

*Figure S12. Recommended steps to follow in order to perform a clinical PET study using sequential BF testing, for a paired or cross-sectional design.*
